# Supplementary material
Source: publisher site journal article supplement (https://www.dovepress.com/article/289826)

| **Table S1 Point Assignments and Prognostic Scores for Each Variable in the SNIG Scoring System** | | |
| --- | --- | --- |
| **Variables** | **Classification** | **Nomogram score** |
| **Size** | **≤ 2cm** | **0** |
|  | **2-5 cm** | **3.895275** |
|  | **5-10 cm** | **6.514159** |
|  | **＞ 10cm** | **10** |
| **Number** | **single** | **0** |
|  | **multiple** | **6.158781** |
| **Microvascular invasion** | **negative** | **0** |
|  | **positive** | **4.567175** |
| **Grade** | **I** | **0** |
|  | **II** | **2.311818** |
|  | **III or IV** | **5.422485** |
| SNIG: the abbreviation of tumor size, number, microvascular invasion, and histological grade | | |

Table S2 Median OS Stratified by Other Clinical Staging Systems in the Training, Internal Validation, and External Validation Sets

| Cohort |  | Median survival time (IQR) | p value |
| --- | --- | --- | --- |
| Training | TNM7th |  |  |
|  | Ⅰ | 36 (17-66) | < 0.001 |
|  | Ⅱ | 28 (12-60) |  |
|  | TNM8th |  |  |
|  | ⅠA | 43 (20-73) | < 0.001 |
|  | ⅠB | 34 (17-64) |  |
|  | Ⅱ | 28 (12-59.5) |  |
|  | LCSGJ |  |  |
|  | Ⅰ | 44 (20.75-71.25) | < 0.001 |
|  | Ⅱ | 35 (17-65) |  |
|  | Ⅲ | 29 (13-60) |  |
|  | Ⅳ | 19 (9-47) |  |
|  | Nomogram |  |  |
|  | < 6 | 42 (12-58) | < 0.001 |
|  | 6~10 | 36 (17-64) |  |
|  | ≥10 | 28 (12-58) |  |
| Internal validation | TNM7th |  |  |
|  | Ⅰ | 40 (18-71) | < 0.001 |
|  | Ⅱ | 28 (11-61) |  |
|  | TNM8th |  |  |
|  | ⅠA | 39 (18-78.5) | < 0.001 |
|  | ⅠB | 40 (18-70) |  |
|  | Ⅱ | 28 (11-60) |  |
|  | LCSGJ |  |  |
|  | Ⅰ | 37 (18-73.25) | <0.001 |
|  | Ⅱ | 40 (18-71) |  |
|  | Ⅲ | 28 (11-60.75) |  |
|  | Ⅳ | 28 (11.25-59) |  |
|  | Nomogram |  |  |
|  | < 6 | 42 (21.75-82) | <0.001 |
|  | 6~10 | 40 (18-70) |  |
|  | ≥10 | 29 (11.5-61) |  |
| External validation | TNM7th |  |  |
|  | Ⅰ | 41 (26-59) | 0.02 |
|  | Ⅱ | 36 (24-53) |  |
|  | TNM8th |  |  |
|  | ⅠA | 51 (35-66) | < 0.001 |
|  | ⅠB | 38 (25-56) |  |
|  | Ⅱ | 36 (24-53) |  |
|  | LCSGJ |  |  |
|  | Ⅰ | 46 (33.5-66.75) | 0.008 |
|  | Ⅱ | 40.5 (26-59) |  |
|  | Ⅲ | 36 (23-53) |  |
|  | Ⅳ | 29 (25-40) |  |
|  | Nomogram |  |  |
|  | < 6 | 56 (35-68) | < 0.001 |
|  | 6~10 | 40 (26-56) |  |
|  | ≥10 | 33 (23-51.5) |  |

Figure S1 Flow chart of study design. HCC, hepatocellular carcinoma; AJCC, The American Joint Committee on Cancer; Tis, tumor *in situ*; OS, overall survival; DCA, decision curve analysis; ROC, receiver operating characteristic


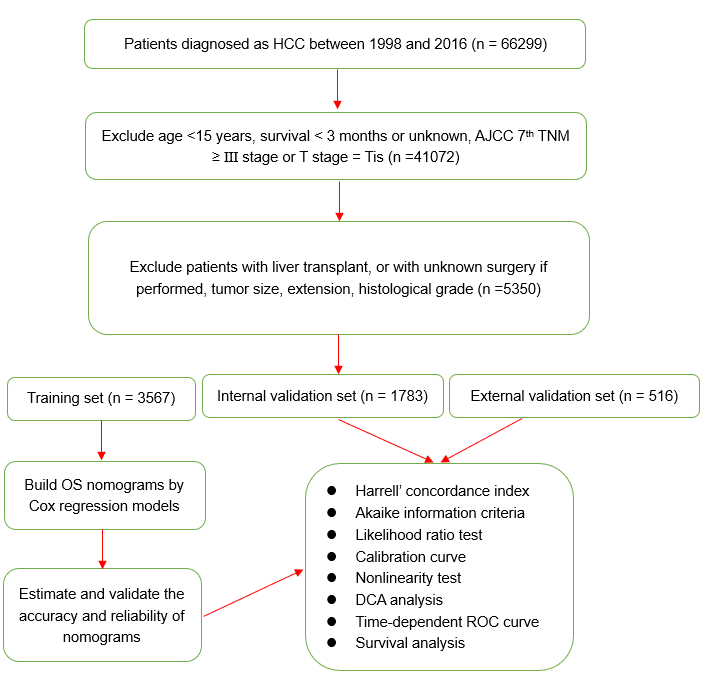


Figure S2 X-tile analysis identifying the optimal cut-off values of points assigned to each variable of SNIG model in the training set. SNIG, abbreviation of the incorporated variables–size, number, MVI, and grade


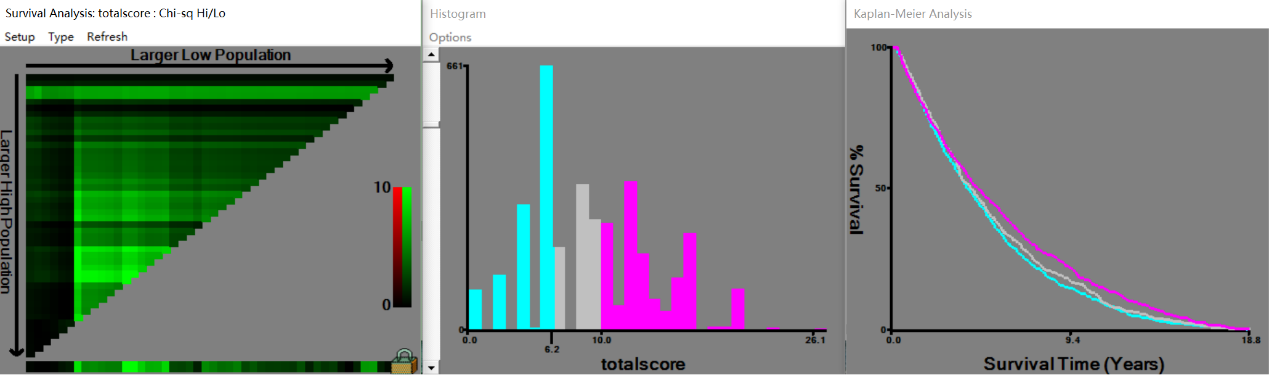


Figure S3 Kaplan-Meier curve of OS in the internal validation set stratified by the 7th AJCC TNM staging (A), 8th AJCC TNM staging (B), LCSGJ TNM staging (C), and nomogram model (D)

.


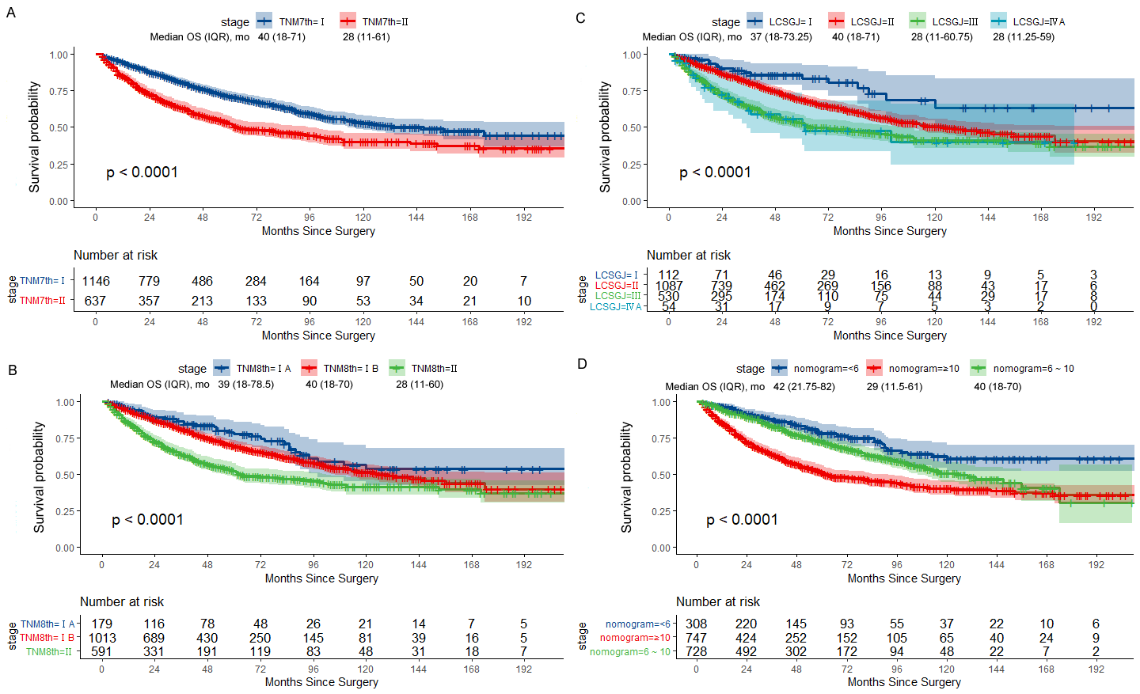


Figure S4 Kaplan-Meier curve of OS in the external validation set stratified by the 7th AJCC TNM staging (A), 8th AJCC TNM staging (B), LCSGJ TNM staging (C), and nomogram model (D)


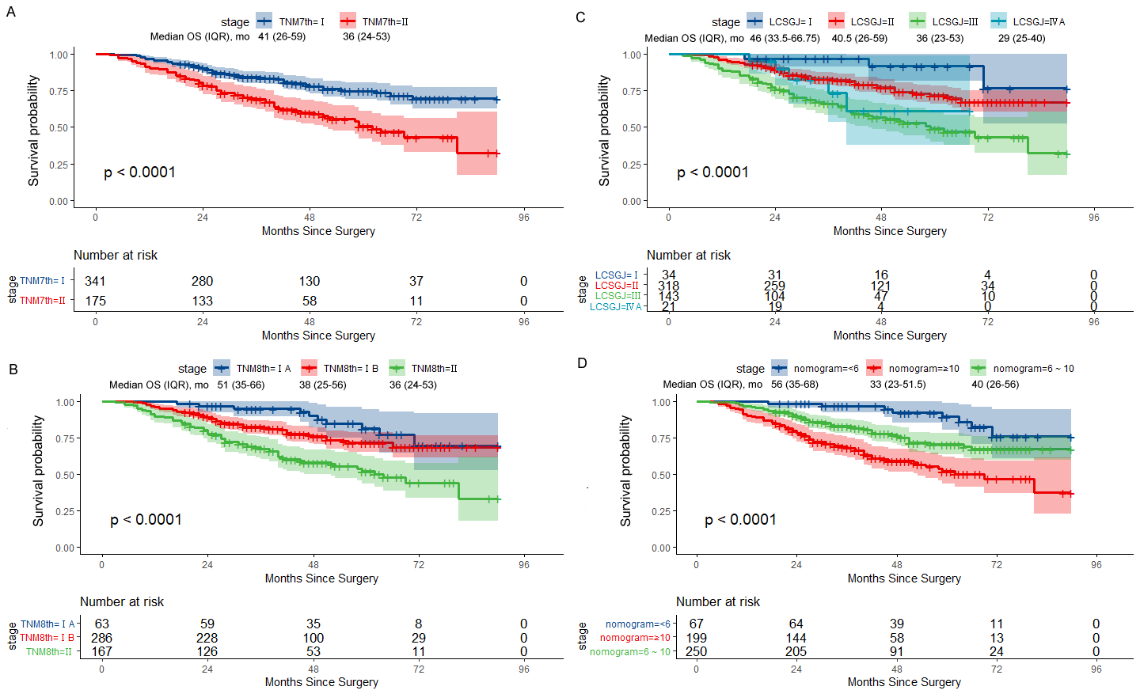

Supplement: Supplementary file 1 [file get_supplementary_file.php]
